# Supplementary material for: End-quenching of tert-chloride-terminated polyisobutylene with alkoxybenzenes: comparison of AlCl3 and TiCl4 catalysts
Source: Royal Society of Chemistry journal article supplement (doi:10.1039/c5py00269a), 2015-01-01
Supplement: c5py00269a1.pdf [file c5py00269a1.pdf]

## Supplementary Information

### End-Quenching of *tert*-Chloride-Terminated Polyisobutylene with Alkoxybenzenes: Comparison of $\text{AlCl}_3$ and $\text{TiCl}_4$ Catalysts

Bin Yang and Robson F. Storey

School of Polymers and High Performance Materials, The University of Southern Mississippi,  
118 College Drive #10076, Hattiesburg, MS 39406-10076

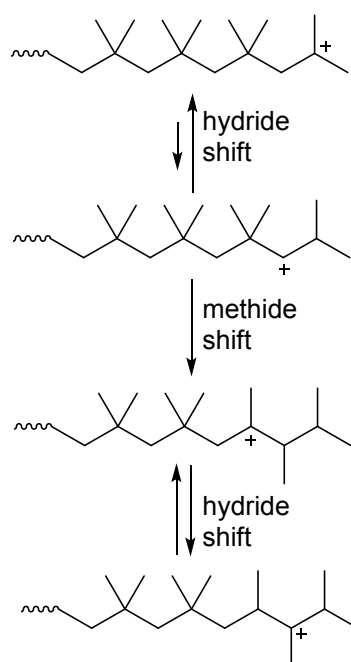

**Figure A.** Likely PIB carbocation rearrangements.

#### References

- R. F. Storey, C. L. Curry and L. B. Brister, *Macromolecules*, 1998, **31**, 1058-1063.  
P. Dimitrov, J. Emert, J. Hua, S. Keki, R. Faust, *Macromolecules*, 2011, **44**, 1831-1840.

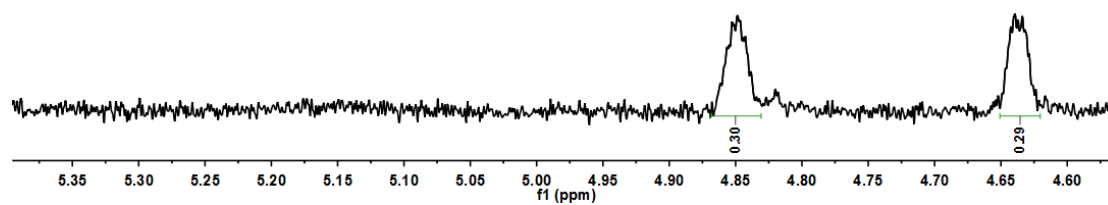

**Figure B.** Expansion of olefinic region of Figure 5A. <sup>1</sup>H NMR (300 MHz, CDCl<sub>3</sub>, 25°C) spectrum of pre-formed *tert*-Cl PIB after quenching with isopropoxybenzene for 15 min (Table 1, entry 9). [CE] = 0.016 M, [isopropoxybenzene] = 0.080 M, [AlCl<sub>3</sub>] = 0.064 M.
